# Supplementary material for: Unnatural enzyme activation by a metal-responsive regulatory protein
Source: Royal Society of Chemistry journal article supplement (doi:10.1039/d4sc02635g), 2024-01-01
Supplement: d4sc02635g1.pdf [file d4sc02635g1.pdf]

Supplementary Information for

## **Unnatural Enzyme Activation by a Metal-Responsive Regulatory Protein**

Olga Halfin,<sup>a</sup> Liat Avram,<sup>b</sup> Shira Albeck,<sup>c</sup> Tamar Unger,<sup>c</sup> Leila Motiei,<sup>a</sup> and David Margulies\*<sup>a</sup>

- <sup>a.</sup> Department of Chemical and Structural Biology, Weizmann Institute of Science, Rehovot, Israel.  
E-mail: david.margulies@weizmann.ac.il
- <sup>b.</sup> Department of Chemical Research Support, Weizmann Institute of Science, Rehovot, Israel
- <sup>c.</sup> Department of Life Sciences Core Facilities, Weizmann Institute of Science, Rehovot, Israel

## 1. Materials and methods

All reagents and solvents were obtained from commercial suppliers. Recombinant human GST isoforms, GST-M1, GST-P1, and mouse recombinant His-Calmodulin were obtained from the Israel Structure Proteomics Center (Weizmann Institute of Science, Rehovot, Israel). Cys-modified mastoparan peptide (INLKALAALAKKILGC) was purchased from Shanghai Hanhong Scientific Co., Ltd. (Shanghai, China). Aluminum-backed silica plates (Merck silica gel 60 F254) were used for thin layer chromatography (TLC) to monitor the solution-phase reactions. TLC visualization was carried out using short wavelength ultraviolet (UV) light at 254 nm. The  $^1\text{H}$ -NMR spectra were recorded using a 300 MHz, 400 MHz, or 500 MHz Bruker AvanceIII (300MHz, 400MHz) and Avance IIIHD (500MHz) NMR spectrometers; a 400 MHz Bruker Avance III NMR spectrometer was also used to record the  $^{13}\text{C}\{^1\text{H}\}$ -NMR spectra. Chemical shifts are reported in ppm on the  $\delta$  scale downfield from TMS as the internal standard. The following abbreviations were used to describe the peaks: s-singlet, d-doublet, dd-double doublet, t-triplet, q-quartet, quin-quintet, m-multiplet, and br-broad. Electrospray mass spectrometry was performed with a Micromass Platform LCZ-4000 instrument at the Weizmann Institute of Science mass spectrometry unit. Preparative HPLC was carried out using an Agilent 218 purification system equipped with an autosampler, a UV-Vis dual wavelength detector, and a 440-LC fraction collector. The analytical purity of all the final compounds was confirmed by using an Agilent 1260 infinity quaternary pump LC system and a maximum pressure 400 bar, equipped with a diode-array UV detector and autosampler. Analysis was performed using a 0.1% TFA water/acetonitrile gradient as the eluent and by detecting the absorbance at 220, 254, 360, 480, 550, and 630 nm. The enzymatic activity-based assays, fluorescence measurements, and fluorescence polarization assays were carried out using a BioTek synergy H4 hybrid multiwall plate reader in either clear flat-bottom polystyrene 384-well microplates (Greiner, for absorption assays) or black flat-bottom polystyrene NBS 384-well microplates (Greiner, for fluorescence assays). LC/MS runs were performed on a Waters ACUITY UPLC class H instrument. In-gel fluorescence detection was performed using a Typhoon<sup>TM</sup> FLA 9500 laser scanner.

## 2. Synthetic Procedures

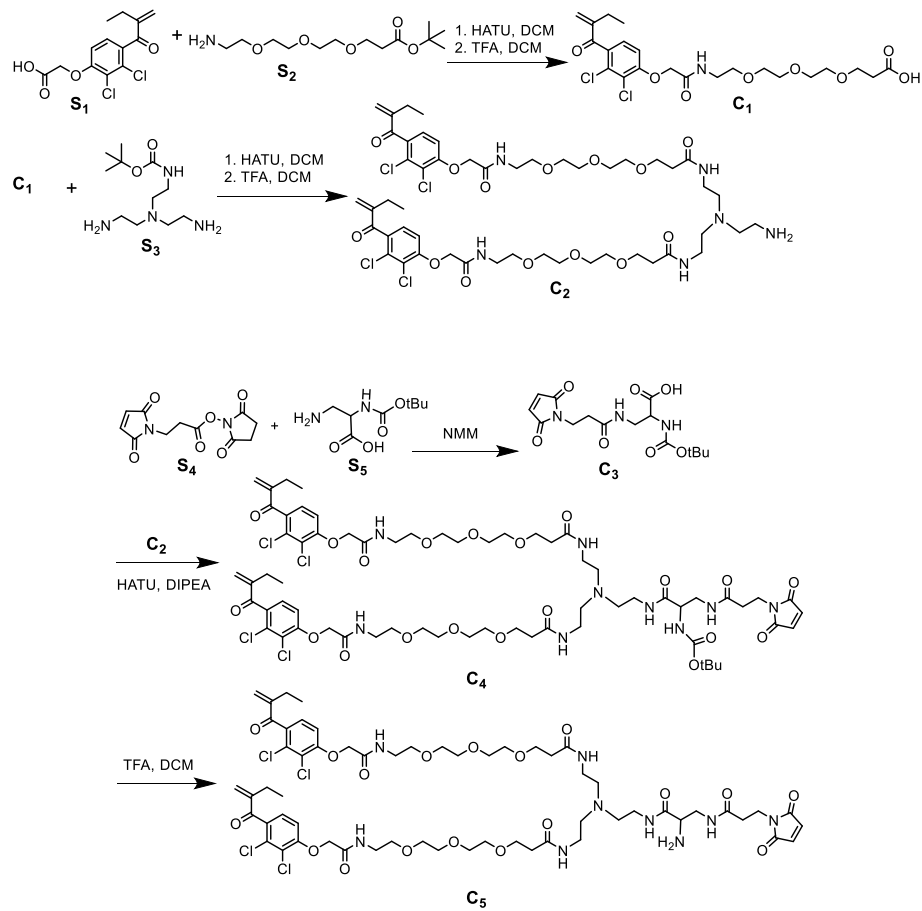





Compounds **C**<sub>1</sub> and **C**<sub>2</sub> were synthesized according to previously reported procedures.<sup>1</sup>

**Compound C**<sub>3</sub>. A solution of N-Succinimidyl 3-maleimidopropionate (**S**<sub>4</sub>, 111.5 mg, 0.42 mmol) in DCM (5 mL) was added dropwise to a solution of N( $\alpha$ )-Boc-L-2,3-diaminopropionic acid (**S**<sub>5</sub>, 134.5 mg, 0.66 mmol) and N-Methylmorpholine (46  $\mu$ L, 0.42 mmol) in DMF (7 mL) at 0 °C. The reaction mixture was allowed to reach room temperature while stirring for 48 hours. After removing the solvent under high vacuum, the crude material was purified by RP-HPLC (162 mg, 87%). <sup>1</sup>H NMR (500 MHz, CD<sub>3</sub>CN):  $\delta$  6.86 (s, 1H), 6.77 (s, 2H), 5.93 (d,  $J$  = 6.9 Hz, 1H), 4.22-4.15 (m, 1H), 3.71 (t,  $J$  = 7.0 Hz, 2H), 3.62-3.55 (m, 1H), 3.41-3.34 (m, 1H), 2.45 (t,  $J$  = 7.0 Hz, 2H), 1.44 (s, 9H). HRMS-ESI ( $m/z$ ): Calcd. for [M+Na]<sup>+</sup> 378.1277; found 378.1283.

**Compound C**<sub>4</sub>. **C**<sub>2</sub> (494.1 mg, 0.44 mmol) and **C**<sub>3</sub> (130.0 mg, 0.36 mmol) were dissolved in DMF (10 mL). HATU (173.3 mg, 0.45 mmol) and DIPEA (504  $\mu$ L, 2.88 mmol) were added, and the reaction mixture was stirred under argon overnight. It was then dried under vacuum, redissolved in DCM (40 mL), and washed with 0.5 M<sub>(aq)</sub> HCl and brine. The organic phase was dried using Na<sub>2</sub>SO<sub>4</sub>, dried under reduced pressure, and purified by combi-flash column chromatography (silica gel, 9% MeOH in DCM) to afford **C**<sub>4</sub> (115 mg, 22%). <sup>1</sup>H NMR (400 MHz, MeOD):  $\delta$  7.28 (d,  $J$  = 8.5 Hz, 2H), 7.13 (d,  $J$  = 8.5 Hz, 2H), 6.83 (s, 2H), 6.06 (s, 2H), 5.62 (s, 2H), 4.74 (s, 4H), 4.20 (t,  $J$  = 5.6 Hz, 1H), 3.80-3.73 (m, 6H), 3.67-3.41 (m, 38H), 2.58-2.41 (m, 10H), 1.46 (s, 9H), 1.16 (t,  $J$  = 7.4 Hz, 6H). <sup>13</sup>C{<sup>1</sup>H}-NMR (100 MHz, MeOD):  $\delta$  195.81, 174.58, 173.09, 172.27, 170.84, 168.36, 156.24, 155.37, 150.28, 134.14, 133.62, 130.38, 128.65, 127.22, 122.40, 111.58, 79.69, 70.18, 70.08, 69.99, 69.89, 68.96, 67.99, 66.58, 54.64, 54.20, 40.65, 38.70, 35.89, 34.78, 34.62, 34.15, 33.89, 27.37, 23.10, 11.60. HRMS-ESI ( $m/z$ ): Calcd. for [M+Na]<sup>+</sup> 1480.5032; found 1480.5028.

**Compound C**<sub>7</sub>. **S**<sub>6</sub> (201.8 mg, 0.80 mmol) and **S**<sub>7</sub> (212.1 mg, 0.82 mmol) were dissolved in acetic anhydride (1 mL). The reaction was then heated to reflux and stirred under argon for 2 h. After the reaction mixture cooled to room temperature, EtOAc (20 mL) was added, and the precipitate (**C**<sub>6</sub>) was collected on a Büchner funnel, washed again with EtOAc, and used without further purification in the next step. Next, **C**<sub>6</sub> (267 mg, 0.63 mmol) was dissolved in acetic anhydride:pyridine (10 mL, 1:1), **S**<sub>8</sub> (222 mg, 0.628 mmol) was added, and the reaction was stirred under reflux for 4 h. After the reaction mixture was cooled to room temperature, EtOH (20 mL) was added, the precipitate was collected on a Büchner funnel, and dried under reduced pressure. The crude was first purified by combi-flash column chromatography (silica gel, 30% MeOH in DCM) and then by RP-HPLC to afford **C**<sub>7</sub> (90.2 mg, 22%). <sup>1</sup>H NMR (400 MHz, MeOD):  $\delta$  8.33 (t,  $J$  = 12.3 Hz, 2H), 7.95-7.88 (m, 4H), 7.36 (dd,  $J_1$  = 8.8,  $J_2$  = 2.2 Hz, 2H), 6.70 (t,  $J$  = 12.4 Hz, 1H), 6.35 (d,  $J$  = 13.8 Hz, 2H), 4.14 (t,  $J$  = 7.1 Hz, 2H), 3.67 (s, 3H), 2.37 (t,  $J$  = 7.2 Hz, 2H), 1.90-1.66 (m, 16H), 1.56-1.43 (m, 2H). <sup>13</sup>C{<sup>1</sup>H}-NMR (100 MHz, MeOD):  $\delta$  174.28, 173.87, 154.93, 154.81, 144.19, 143.54, 141.19, 141.11,

126.67, 126.25, 119.99, 119.88, 110.21, 110.06, 103.93, 103.72, 49.17, 43.56, 41.70, 33.06, 30.34, 29.37, 26.66, 26.42, 26.27, 25.85, 24.24. HRMS-ESI ( $m/z$ ): Calcd. for  $[M-H]^-$  641.1991; found 641.1985.

**Compound bis-EA-a.** A solution of **C<sub>4</sub>** (115 mg, 0.08 mmol) in TFA:DCM (6 mL, 1:1) was stirred at room temperature for 3 h. The solvent was then removed under high vacuum to afford **C<sub>5</sub>**. Next, **C<sub>5</sub>** (25 mg, 18.4  $\mu$ mol) and **C<sub>7</sub>** (9.9 mg, 15.4  $\mu$ mol) were mixed in DMF (1 mL). HATU (6.84 mg, 18.0  $\mu$ mol) and DIPEA (7.8  $\mu$ L, 4.50  $\mu$ mol) were added, and the reaction was stirred overnight under argon at room temperature. After the reaction was completed, the crude material was purified by RP-HPLC, which afforded **bis-EA-a** (10.0 mg, 32%). <sup>1</sup>H NMR (400 MHz, (CD<sub>3</sub>)<sub>2</sub>SO):  $\delta$  8.35 (t,  $J$  = 13.0 Hz, 2H), 7.83 (s, 2H), 7.65 (d,  $J$  = 8.1 Hz, 2H), 7.33 (d,  $J$  = 8.6 Hz, 2H), 7.28 (d,  $J$  = 9.3 Hz, 2H), 7.10 (d,  $J$  = 8.6 Hz, 2H), 6.97 (s, 2H), 6.55 (t,  $J$  = 12.3 Hz, 1H), 6.28 (t,  $J$  = 15.7 Hz, 2H), 6.07 (s, 2H), 5.56 (s, 2H), 4.73 (s, 4H), 4.26-4.17 (m, 3H), 3.63-3.55 (m, 7H), 3.52-3.34 (m, 24H), 3.33-3.20 (m, 12H), 2.42-2.31 (m, 10H), 2.12 (t,  $J$  = 6.8 Hz, 2H), 1.69 (s, 12H), 1.54 (q,  $J$  = 6.9 Hz, 2H), 1.40-1.29 (m, 2H), 1.29-1.21 (m, 2H), 1.07 (t,  $J$  = 7.5 Hz, 6H). <sup>13</sup>C{<sup>1</sup>H}-NMR (100 MHz, (CD<sub>3</sub>)<sub>2</sub>SO):  $\delta$  195.61, 174.26, 173.24, 172.81, 171.99, 171.43, 171.25, 170.66, 167.15, 158.88, 158.53, 155.87, 154.75, 154.63, 149.83, 145.76, 145.33, 143.19, 142.64, 140.97, 140.92, 135.00, 132.99, 129.92, 129.83, 127.98, 126.57, 126.48, 126.12, 121.63, 120.40, 120.32, 127.85, 114.94, 112.45, 110.58, 104.15, 103.80, 70.19, 70.13, 70.04, 69.98, 69.26, 68.33, 66.96, 53.28, 52.60, 52.18, 49.37, 49.31, 43.84, 39.35, 38.84, 36.38, 35.37, 34.82, 34.33, 34.30, 34.16, 31.71, 27.57, 27.37, 27.10, 26.16, 25.09, 23.40, 12.82. HRMS-ESI ( $m/z$ ): Calcd. for  $[M+H]^+$  1982.6652; found 1982.6624.

**Compound CT-3a. bis-EA-a** (16.4 mg, 8.25  $\mu$ mol) was dissolved in ACN:DDW(400  $\mu$ L, 1:1); then TEAA (50  $\mu$ L) and DMSO (200  $\mu$ L) were added. Next, cysteine-modified mastoparan peptide (5.1 mg, 3.10  $\mu$ mol) was dissolved in DDW (300  $\mu$ L) and added to the reaction mixture. The reaction was stirred at room temperature for 3 h and monitored by HPLC. After the reaction was completed, the crude material was immediately purified by RP-HPLC to afford **CT-3a** (3.6 mg, 32%). HRMS-ESI ( $m/z$ ): Calcd. for  $[M+H]^+$  3622.71; found 3623.71.

**Compound C<sub>8</sub>.** A solution of dansyl chloride (**S<sub>9</sub>**, 708 mg, 2.63 mmol) in DCM (7.5 mL) was added dropwise to a solution of N( $\alpha$ )-Boc-L-2,3-diaminopropionic acid (**S<sub>10</sub>**, 590.0 mg, 2.89 mmol) and triethylamine (764  $\mu$ L, 5.47 mmol) in DCM (7.5 mL) at 0 °C. The reaction mixture was allowed to reach room temperature while stirring under argon overnight. Next, the solvent was dried under reduced pressure and purified by combi-flash column chromatography (silica gel, 3% MeOH in DCM) to afford **C<sub>8</sub>** (115 mg, 22%). <sup>1</sup>H NMR (400 MHz, MeOD):  $\delta$  8.58 (d,  $J$  = 8.5 Hz, 1H), 8.44 (d,  $J$  = 8.5 Hz, 1H), 8.25 (d,  $J$  = 7.3 Hz, 1H), 7.66 (t,  $J$  = 8.0 Hz, 2H), 7.43 (d,  $J$  = 7.6 Hz, 1H), 4.10 (t,  $J$  = 5.2 Hz, 1H), 3.27 (d,  $J$  = 4.5 Hz, 2H), 3.00 (s, 6H), 1.41 (s, 9H). <sup>13</sup>C{<sup>1</sup>H}-NMR (100 MHz, MeOD):  $\delta$  172.00, 156.23, 151.81, 135.34, 129.97, 129.88, 129.49, 128.82, 127.83, 122.91, 119.04, 115.10, 79.35, 53.73, 44.40, 43.50, 27.27. HRMS-ESI ( $m/z$ ): Calcd. for  $[M-H]^-$  436.1542; found 436.1537.

**Compound C<sub>9</sub>.** C<sub>2</sub> (76.9 mg, 0.07 mmol) and C<sub>8</sub> (23.0 mg, 0.05 mmol) were first dissolved in DCM (3 mL), and then HATU (34.9 mg, 0.09 mmol) and DIPEA (65.80  $\mu$ L, 0.38 mmol) were added. The reaction was stirred under argon overnight at room temperature. The mixture was then washed with water and sodium bicarbonate<sub>(aq)</sub>. The organic phase was dried using Na<sub>2</sub>SO<sub>4</sub>, dried under reduced pressure, and purified by combi-flash column chromatography (silica gel, 5% MeOH in DCM) to afford C<sub>9</sub> (49 mg, 58.9%). <sup>1</sup>H NMR (400 MHz, MeOD):  $\delta$  8.58 (d, *J* = 8.5 Hz, 1H), 8.33 (d, *J* = 8.8 Hz, 1H), 8.18 (d, *J* = 7.5 Hz, 1H), 7.94 (t, *J* = 5.0 Hz, 1H), 7.61 (t, *J* = 8.3 Hz, 2H), 7.32 (d, *J* = 7.5 Hz, 1H), 7.25 (d, *J* = 8.5 Hz, 2H), 7.10 (d, *J* = 8.5 Hz, 2H), 6.05 (s, 2H), 5.60 (s, 2H), 4.72 (s, 4H), 4.20 (t, *J* = 5.0 Hz, 1H), 3.73 (t, *J* = 5.1 Hz, 6H), 3.65-3.41 (m, 36H), 3.21 (d, *J* = 4.7 Hz, 2H), 2.91 (s, 6H), 2.52 (t, *J* = 5.2 Hz, 4H), 2.46 (q, *J* = 7.5 Hz, 4H), 1.44 (s, 9H), 1.15 (t, *J* = 7.4 Hz, 6H). <sup>13</sup>C{<sup>1</sup>H}-NMR (100 MHz, MeOD):  $\delta$  195.82, 174.78, 172.76, 168.38, 156.18, 155.33, 151.59, 150.27, 135.29, 133.61, 130.37, 129.93, 129.76, 129.43, 128.70, 128.66, 127.95, 127.20, 123.10, 122.40, 119.09, 115.28, 111.55, 79.83, 70.15, 70.05, 69.97, 69.87, 68.95, 67.97, 66.55, 54.77, 54.55, 44.47, 43.61, 38.67, 35.81, 34.96, 34.80, 27.35, 23.09, 11.59. HRMS-ESI (*m/z*): Calcd. for [M+Na]<sup>+</sup> 1562.5273; found 1562.5277.

**Compound bis-EA-b.** A solution of C<sub>9</sub> (74.8 mg, 0.05 mmol) in TFA:DCM (3 mL, 1:1) was stirred at room temperature for 3 h. The solvent was then removed under high vacuum. The resulting material (C<sub>10</sub>) was redissolved in DCM (3 mL), and then HATU (26.6 mg, 0.07 mmol), DIPEA (36.0  $\mu$ L, 0.21 mmol), and 3-maleimidopropionic acid (S<sub>11</sub>, 11.3 mg, 0.07 mmol) were added, and the reaction mixture was stirred under argon overnight at room temperature. The mixture was then washed with water, and the organic phase was dried using Na<sub>2</sub>SO<sub>4</sub>, and dried under reduced pressure. The crude was then purified by combi-flash column chromatography (silica gel, 7% MeOH in DCM) to afford bis-EA-b (45 mg, 56.5%). <sup>1</sup>H NMR (400 MHz, MeOD):  $\delta$  8.57 (d, *J* = 8.5 Hz, 1H), 8.31 (d, *J* = 8.7 Hz, 1H), 8.19 (d, *J* = 6.5 Hz, 1H), 7.59 (t, *J* = 7.8 Hz, 2H), 7.28 (d, *J* = 7.6 Hz, 1H), 7.25 (d, *J* = 8.5 Hz, 2H), 7.10 (d, *J* = 8.5 Hz, 2H), 6.81 (s, 2H), 6.04 (s, 2H), 5.60 (s, 2H), 4.72 (s, 4H), 4.35 (t, *J* = 6.2 Hz, 1H), 3.81-3.66 (m, 6H), 3.66-3.46 (m, 26H), 3.30-3.15 (m, 8H), 2.91 (s, 6H), 2.58 (t, *J* = 6.0 Hz, 4H), 2.51-2.41 (m, 10H), 1.15 (t, *J* = 7.4 Hz, 6H). <sup>13</sup>C{<sup>1</sup>H}-NMR (100 MHz, MeOD):  $\delta$  195.81, 174.72, 171.89, 171.85, 170.94, 168.37, 155.33, 151.58, 150.27, 135.17, 134.17, 133.61, 130.37, 129.98, 129.75, 129.40, 128.86, 128.65, 127.97, 127.20, 123.14, 122.39, 119.10, 115.29, 111.56, 70.16, 70.05, 69.97, 69.86, 68.94, 67.97, 66.55, 54.92, 54.46, 53.61, 44.47, 43.04, 38.68, 35.86, 34.95, 34.71, 34.19, 33.72, 23.09, 11.58. HRMS-ESI (*m/z*): Calcd. for [M+Na]<sup>+</sup> 1613.5018; found 1613.5027.

**Compound CT-3b.** bis-EA-b (14.0 mg, 8.79  $\mu$ mol) was dissolved in ACN (150  $\mu$ L), and TEAA (12.5  $\mu$ L) was added. Next, cysteine-modified mastoparan peptide (8.1 mg, 4.94  $\mu$ mol) was dissolved in DDW (100  $\mu$ L) and added to the reaction mixture. The reaction was stirred at room temperature for 8 h and monitored



by HPLC. After completion, the crude material was immediately purified by RP-HPLC to afford **CT-3b** (2.9 mg, 18.2%). HRMS-ESI ( $m/z$ ): Calcd. for  $[M+H]^+$  3232.58; found 3232.55.

**3. GST inhibition assays.** The inhibitory effect of CT-3a and CT-3b on GST-M1-1 and GST-P1-1 activity was assessed according to the method established by Habig et al.<sup>2</sup> GST activity was determined spectrophotometrically using 1-chloro-2,4-dinitrobenzene (CDNB) and glutathione (GSH) as substrates in phosphate-buffered saline (PBS) solution (4 mM, pH = 7.4). Briefly, GST was incubated with either CT-3a or CT-3b for 10 minutes at 25°C. Subsequently, CDNB and GSH were added, and the formation of the GS-CDNB conjugate was monitored using a microplate reader at  $\lambda=340$  nm. To obtain the inhibition constants ( $K_i$ ) of both CTs, GST-M1 at three different concentrations (5, 10, and 20 nM) was incubated with increasing concentrations of either CT-3a or CT-3b (0-1000 nM). The concentrations of CDNB and GSH were 1.5 mM and 3 mM, respectively. The data are expressed as the mean values  $\pm$  std. deviation of triplicate measurements. The data were plotted and analyzed using GraphPad Prism 7.02 and fitted to the Morrison equation for tight binding substrates.<sup>3-4</sup>

$$Y = \frac{V_0 (1 - (E + X + Q) - \{(E + X + Q)^2 - 4 \cdot E \cdot X\}^{1/2})}{2 \cdot E}, \quad Q = K_i \cdot \left(1 + \frac{S}{K_m}\right)$$

where Y is the enzyme activity, X represents different concentrations of the inhibitor (CT-3a or CT-3b), E is the enzyme concentration, S is the concentration of substrate,  $K_m$  is the Michaelis-Menten constant determined in an experiment without an inhibitor, and  $V_0$  is the initial velocity.

To obtain the half maximal inhibitory concentration ( $IC_{50}$ ) of both CTs to GST-P1, GST-P1 (20 nM) was incubated with increasing concentrations of either CT-3a or CT-3b (0-1000 nM). The concentrations of CDNB and GSH were 1.5 mM and 3 mM, respectively. The data are expressed as the mean values  $\pm$  std. deviation of triplicate measurements. The data were plotted and analyzed using GraphPad Prism 7.02 and fitted to a normalized dose-response inhibition curve.

$$Y = \frac{100}{1 + 10^{(\log X - \log IC_{50})}}$$

where Y is the relative calculated  $V_0$  and X represents different concentrations of the inhibitor (CT-3a or CT-3b).

**4. Fluorescence polarization assays.** The dissociation constant between CT-3a and CaM was determined using a fluorescence polarization (FP) assay conducted at room temperature. The assay was performed with a BioTek Synergy H4 hybrid plate reader equipped with suitable excitation and emission polarizers. Initially, the fluorescence polarization of CT-3a (0-250 nM) in PBS buffer (4 mM, pH = 7.4) was measured

to identify the optimal concentration of CT-3a that produces a stable polarization signal. Subsequently, 50 nM of CT-3a was incubated for 10 minutes with increasing concentrations of CaM (0-1.28  $\mu$ M) in PBS (4 mM, pH = 7.4), with or without CaCl<sub>2</sub> (0.3 mM). The degree of polarization was measured using excitation and emission filters of 635/20 and 671/20, respectively, along with a 660 nm cut-off mirror. The data corrections for increases in the fluorescence of CT-3a were applied following previously published procedures.<sup>5-6</sup> The results are presented as mean values  $\pm$  standard deviation of hexa-replicate measurements. The data were analyzed using GraphPad Prism 7.02 and fitted to the following saturation equation:

$$X = \frac{[\text{Protein}]}{[\text{Protein}] + K_d}$$

where X represents the bound protein fraction.

**5. Dissociation Constant of CT-3b and CaM (Ca<sup>2+</sup>).** To estimate the dissociation constant between CT-3b and CaM (Ca<sup>2+</sup>), changes in the fluorescence signal of dansyl were monitored with increasing CaM (Ca<sup>2+</sup>) concentrations. CT-3b (400 nM) was incubated for 10 min with increasing concentrations of CaM (0-1.28  $\mu$ M) in PBS (4 mM, pH = 7.4) in the absence or presence of CaCl<sub>2</sub> (0.3 mM). Subsequently, the fluorescence intensity was recorded at 500 nm ( $\lambda_{\text{ex}}$ =340 nm). The data are presented as the mean values  $\pm$  std. deviation of triplicate measurements. Analysis was performed using GraphPad Prism 7.02 and fitted to the following saturation equation:

$$IF = \frac{IF_{\text{max}} \cdot L}{k_d + L}$$

where IF represents the fluorescence intensity at a relative protein concentration (L), IF<sub>max</sub> is the maximum fluorescence intensity at saturation, and L is the concentration of the protein.

**6. GST-CaM(Ca<sup>2+</sup>) Communication.** The communication between GST and CaM was assessed by monitoring the activity of GST, following the previously described procedure. GST-M1 (10 nM) or GST-P1 (20 nM) was incubated for 10 minutes with either CT-3a or CT-3b (at concentrations of 200 nM for GST-M1 and 400 nM for GST-P1), along with CaM (1  $\mu$ M) in PBS buffer (4 mM, pH = 7.4). Subsequently, CaCl<sub>2</sub> (0.3 mM) was added, and the samples were further incubated for 10 minutes. Then, CDNB (720  $\mu$ M) and GSH (350  $\mu$ M) were introduced, and the enzymatic reaction was monitored spectrophotometrically at 340 nm. Control experiments were conducted using compounds bis-EA-a and bis-EA-b, following a similar protocol.

**7. LC/MS measurement.** GST-M1 (1.25  $\mu\text{M}$ ) or GST-P1 (1.25  $\mu\text{M}$ ) was incubated for 10 min in the absence or presence of CT-3a (2.5  $\mu\text{M}$ ), and injected into LC/MS. The LC/MS analyses were performed on a Waters ACUITY UPLC class H instrument in a positive ion mode using electrospray ionization. Gradient separations were carried out a  $\text{C}_4$  column (300  $\text{\AA}$ , 1.7  $\mu\text{m}$ , 21 mm x 100 mm) using 0.1% (v/v) formic acid in water (solvent A) and 0.1% (v/v) formic acid in acetonitrile (solvent B) at a flow rate of 0.4 mL/min. The column was held at 40  $^\circ\text{C}$  and the autosampler at 10  $^\circ\text{C}$ . Mass data were collected using a Waters SQD2 detector with an  $m/z$  range of 2-3071.98 at a range of 700-1300  $m/z$ . The desolvation temperature was 500  $^\circ\text{C}$  with a flow rate of 1000 L/h. The capillary and cone voltages were maintained at 0.69 kV and 46 V, respectively. Raw data were processed using openLYNX, deconvoluted using MaxEnt, and plotted using GraphPad Prism 7.02.

**8. Fluorescence in-gel detection.** CT-3a (300 nM) was incubated with different combinations of GST-P1 (300 nM), CaM (300 nM),  $\text{CaCl}_2$  (0.09 mM), and EDTA (9 mM). Next, the samples were subjected to electrophoresis on a 12% acrylamide gel that was prepared by mixing a 30% acrylamide solution in Tris-HCl (375 mM, pH = 8.8) supplemented with SDS (0.1%), APS (0.12%), and TEMED (0.1%). Electrophoresis was conducted at 120 V for 1 h. Subsequently, the gels were scanned using a Typhoon<sup>TM</sup> FLA 9500 laser scanner equipped with a 635/670 nm excitation/emission filter set.

**9. Real-time changes in GST activity.** To monitor real-time changes in GST activity, the enzymatic reaction was conducted simultaneously in two wells. Each well contained GST (10 nM), CT-3a or CT-3b (200 nM), and apoCaM (1000 nM). After a 10-minute incubation, CDNB (720  $\mu\text{M}$ ) and GSH (350  $\mu\text{M}$ ) were added, and the enzymatic activity of GSTs was measured. At 210 sec into the measurement, 0.3 mM  $\text{CaCl}_2$  was added to one of the wells, and the enzymatic activity was continuously monitored in real time. In another assay, GST (10 nM) was incubated with CT-3a or CT-3b (200 nM), apoCaM (1000 nM), and  $\text{CaCl}_2$  (0.3 mM). After a 10-minute incubation, CDNB (720  $\mu\text{M}$ ) and GSH (350  $\mu\text{M}$ ) were added, and the enzymatic activity of GSTs was measured. At 210 sec into the measurement, 3 mM EDTA was added to one of the wells, and the enzymatic activity was continuously monitored in real time.

**10. Reversible switching of GST activity.** GST-M1 (10 nM) was incubated with CT-3b (200 nM) and apoCaM (1  $\mu\text{M}$ ) for 10 min. Then  $\text{CaCl}_2$  and EDTA were sequentially added to the mixture with a 3-minute interval between each addition. Finally, CDNB (720  $\mu\text{M}$ ) and GSH (350  $\mu\text{M}$ ) were added, and the initial velocities ( $V_0$ ) were measured. The data are expressed as the mean values  $\pm$  std. deviation of triplicate measurements.

## Supplementary Figures

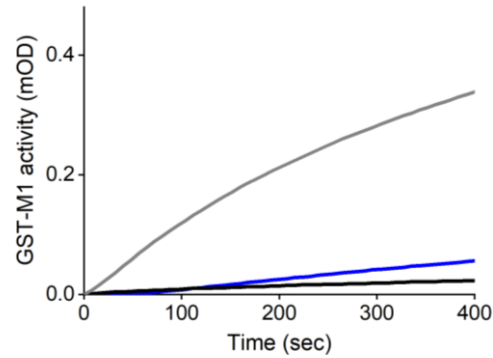

Fig. S1. Activity of GST-M1 before (grey line) and after the addition of 5  $\mu\text{M}$  EA (blue line), or 200 nM CT-3a (black line).

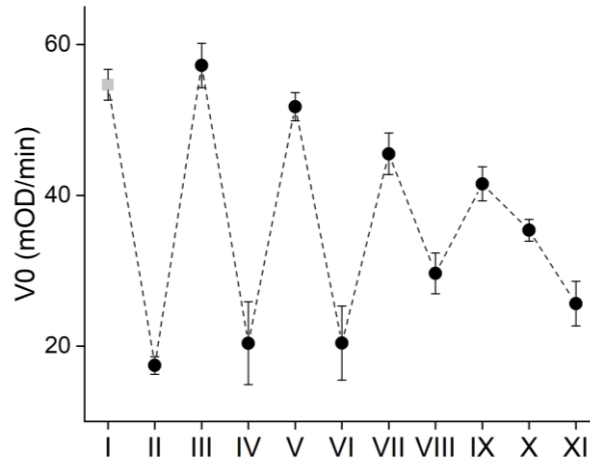

Fig. S2. Initial velocity ( $V_0$ ) measured before (I) and after (II) the addition of CT-3b to GST-M1 in the presence of CaM, followed by sequential additions of (III)  $\text{Ca}^{2+}$  (20  $\mu\text{M}$ ), (IV) EGTA (80  $\mu\text{M}$ ), (V)  $\text{Ca}^{2+}$  (100  $\mu\text{M}$ ), (VI) EGTA (400  $\mu\text{M}$ ), (VII)  $\text{Ca}^{2+}$  (500  $\mu\text{M}$ ), (VIII) EGTA (3 mM), (IX)  $\text{Ca}^{2+}$  (3.75 mM), (X) EGTA (22.5 mM), and (XI)  $\text{Ca}^{2+}$  (28 mM).

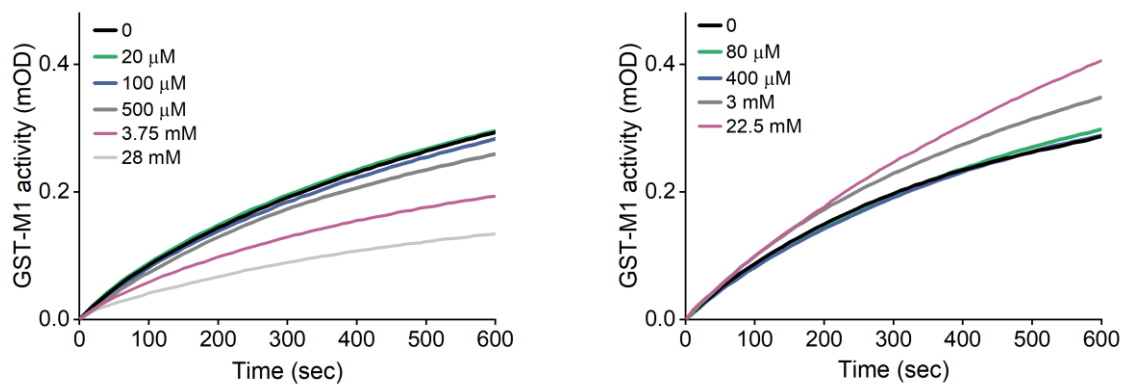

Fig. S3. Activity of GST-M1 upon addition of various concentration of Ca<sup>2+</sup>(left) or EGTA (right).

**<sup>1</sup>H NMR spectrum of compound bis-EA-a (400.13 MHz, DMSO-d<sub>6</sub>)**

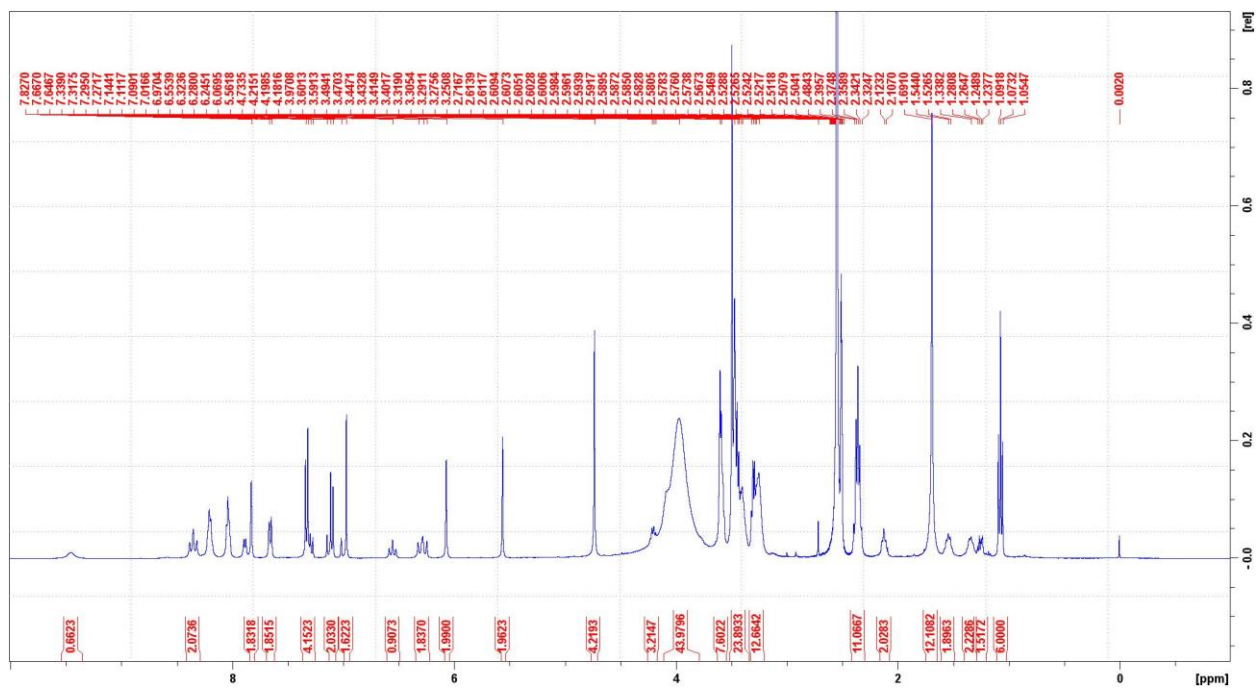

**<sup>1</sup>H-<sup>1</sup>H COSY spectrum of compound bis-EA-a (400.13 MHz, DMSO-d<sub>6</sub>)**

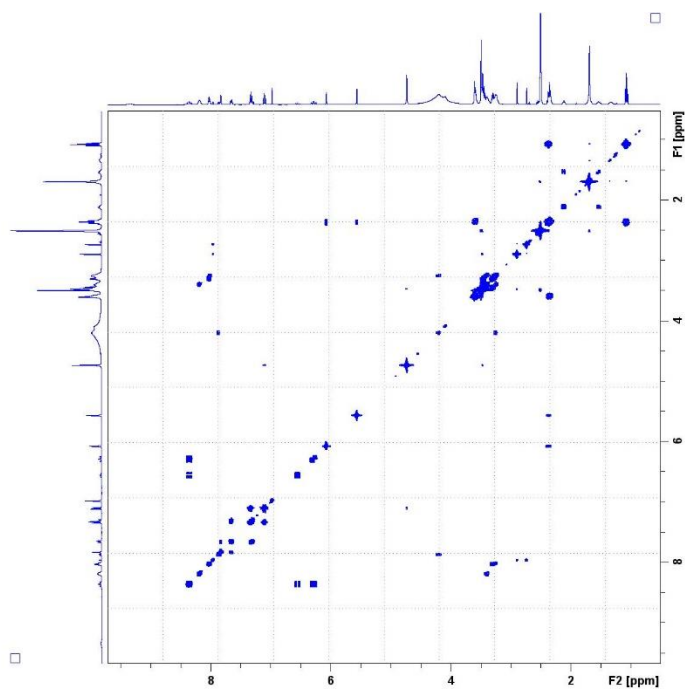

$^{13}\text{C}\{^1\text{H}\}$  NMR spectrum of compound bis-EA-a (400.13 MHz, DMSO- $d_6$ )

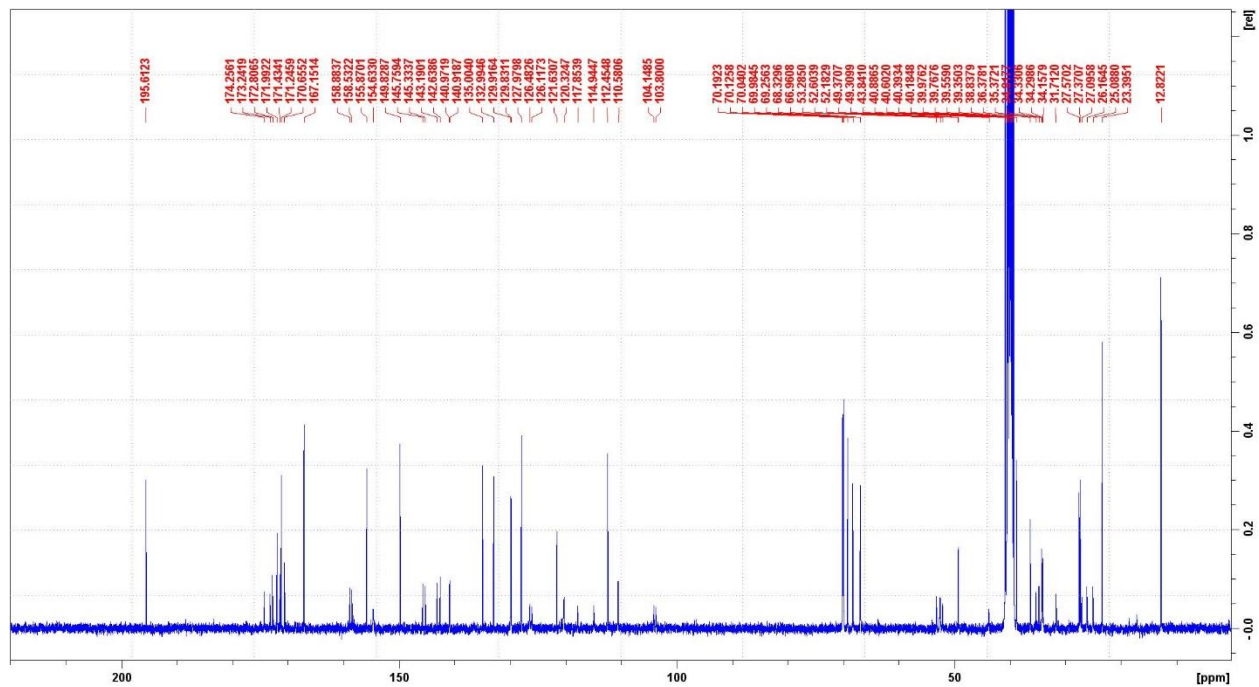

$^1\text{H}$ - $^{13}\text{C}$  phase sensitive HSQC of compound bis-EA-a (400.13 MHz, DMSO- $d_6$ )

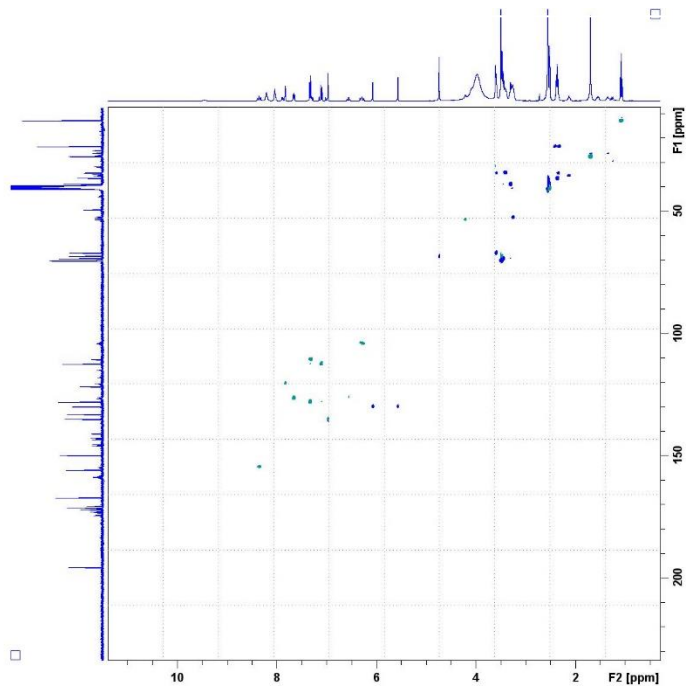

$^1\text{H}$ - $^{13}\text{C}$  HMBC of compound bis-EA-a (400.13 MHz, DMSO- $d_6$ )

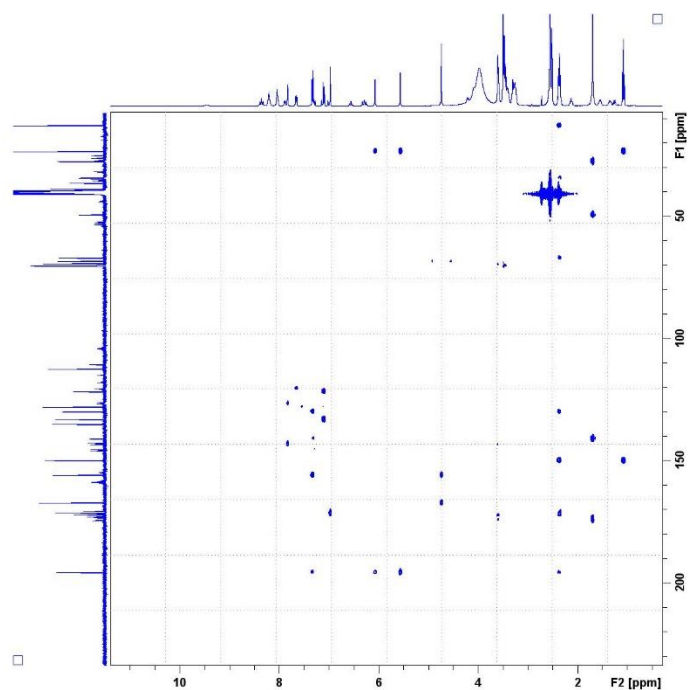

$^1\text{H}$  NMR spectrum of compound bis-EA-b (400.13 MHz,  $\text{CD}_3\text{OD}$ )

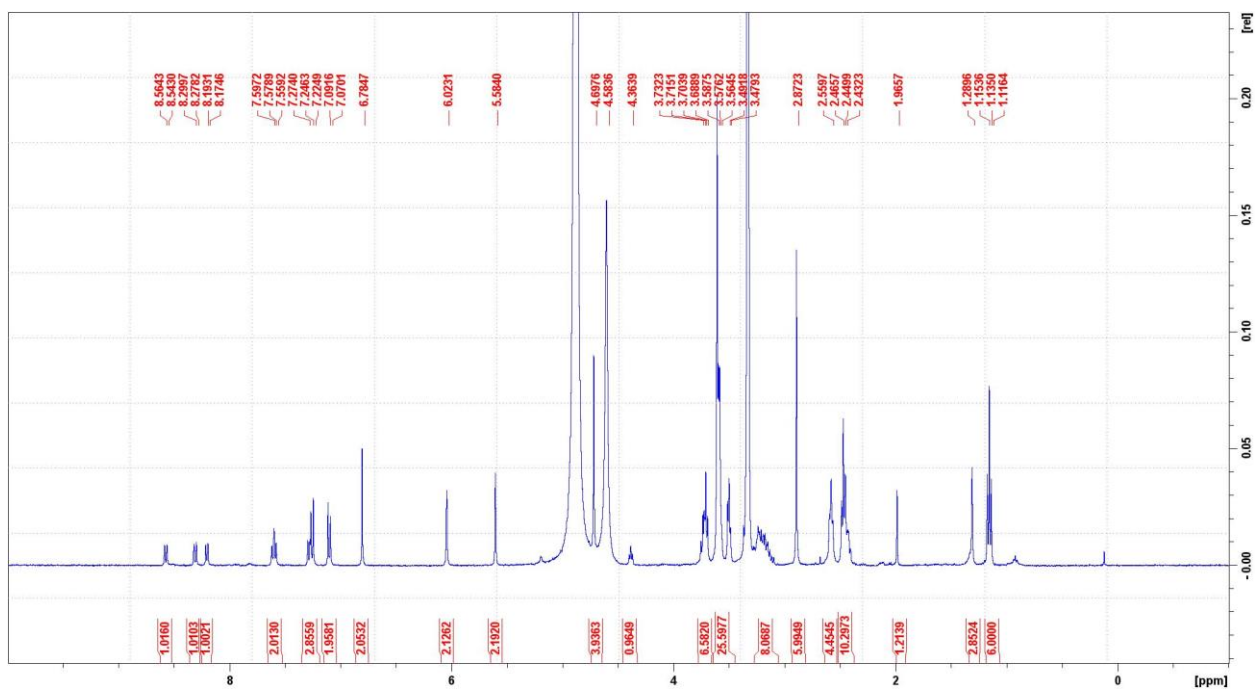



$^1\text{H}$ - $^1\text{H}$  COSY spectrum of compound bis-EA-b (400.13 MHz,  $\text{CD}_3\text{OD}$ )

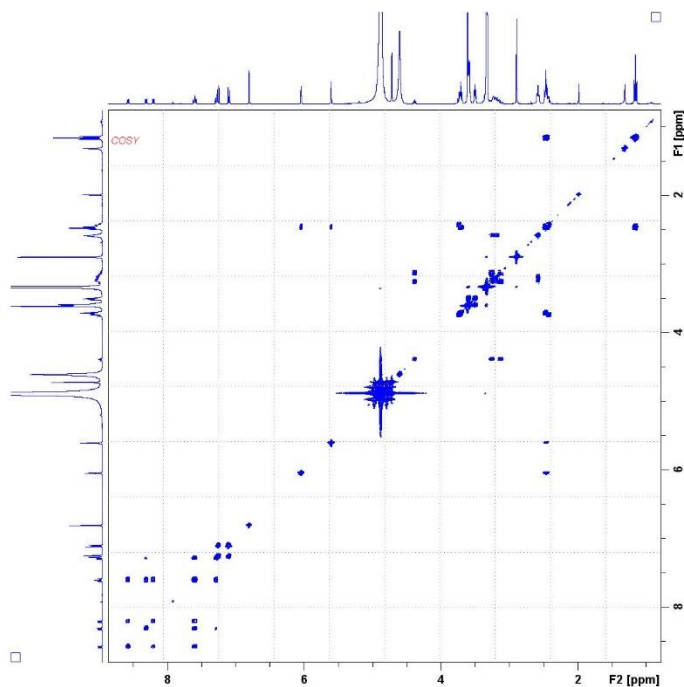

$^{13}\text{C}\{^1\text{H}\}$  NMR spectrum of compound bis-EA-b (100.67 MHz,  $\text{CD}_3\text{OD}$ )

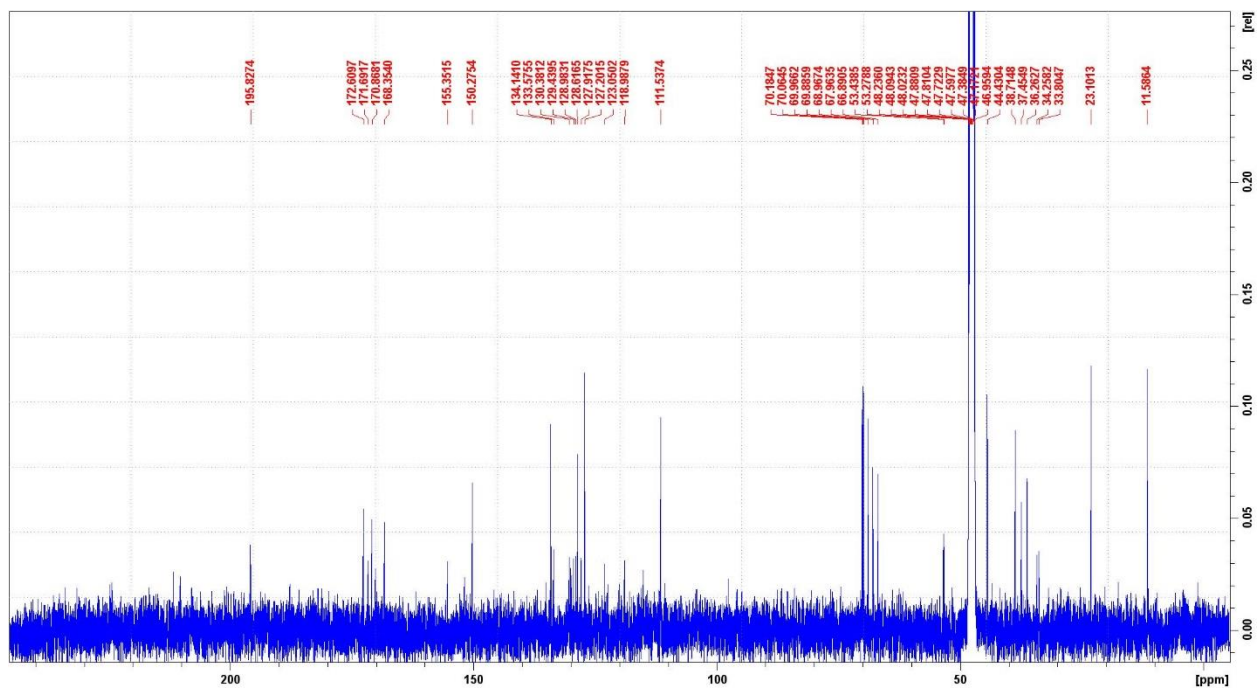

**$^1\text{H}$ - $^{13}\text{C}$  phase sensitive HSQC of compound bis-EA-b (400.13 MHz,  $\text{CD}_3\text{OD}$ )**

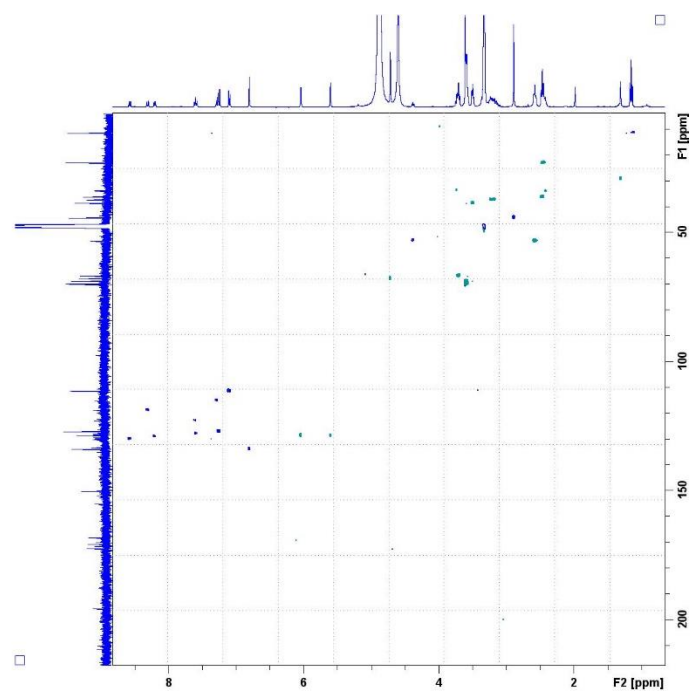

**HPLC chromatograms of CT-3a and CT-3b.**

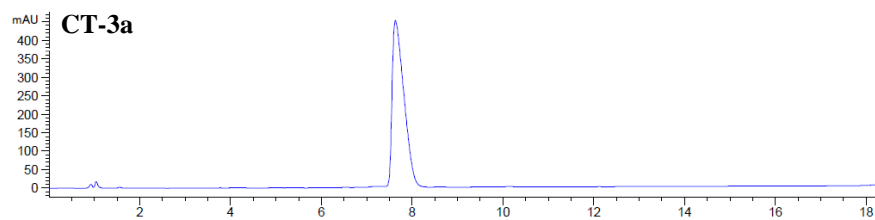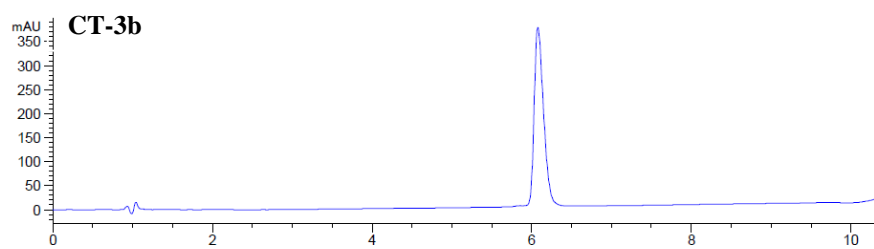

MS spectrum and isotopic patterns for CT-3a. (top) Full spectrum; (b) simulated mass (top), and experimental mass distribution (bottom) for  $[M]^{3+}$ , c) simulated mass (top), and experimental mass distribution (bottom) for  $[M]^{4+}$ .

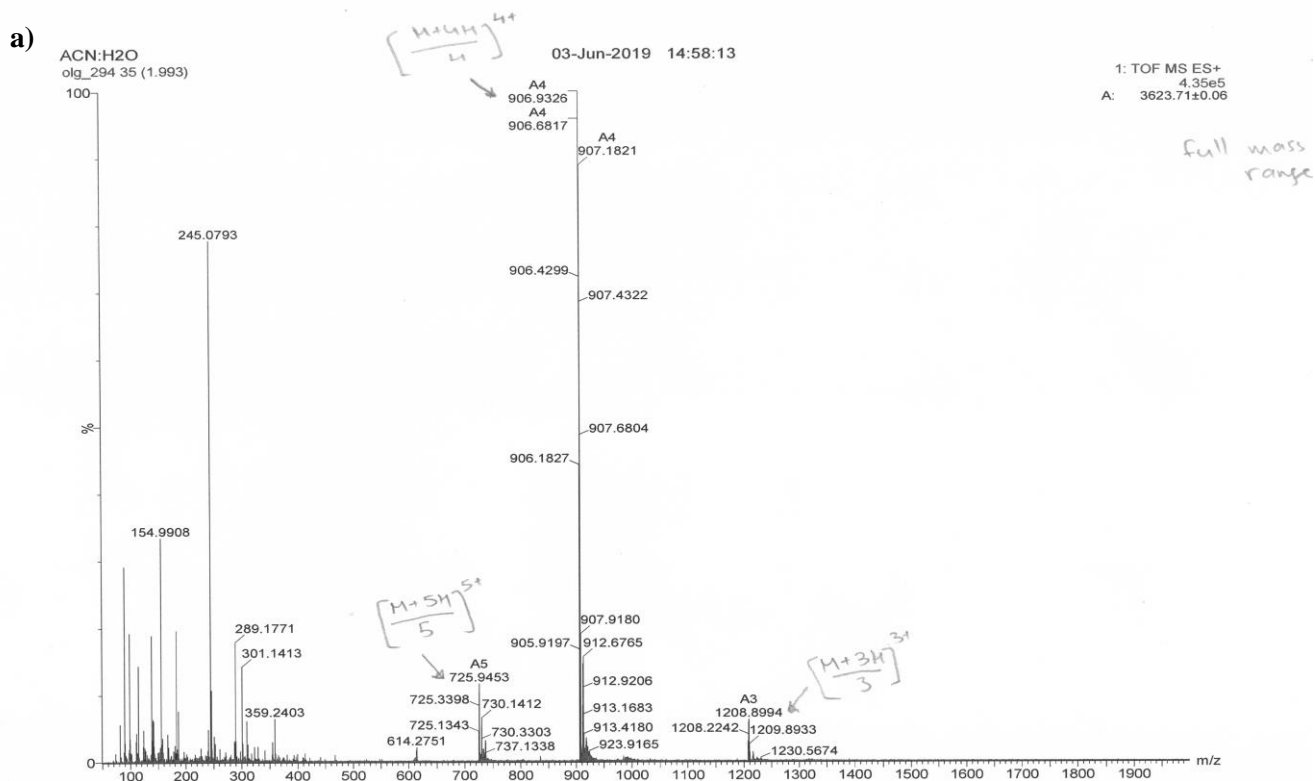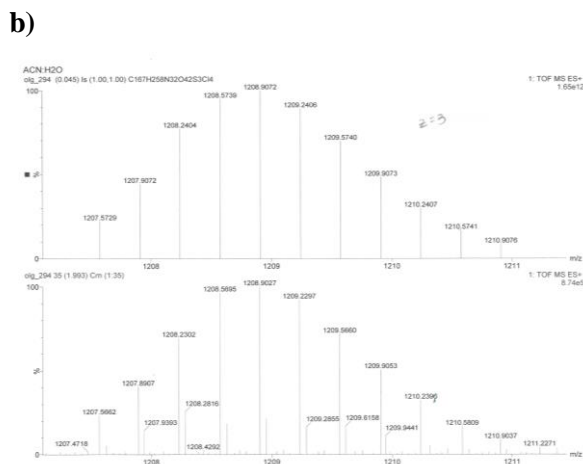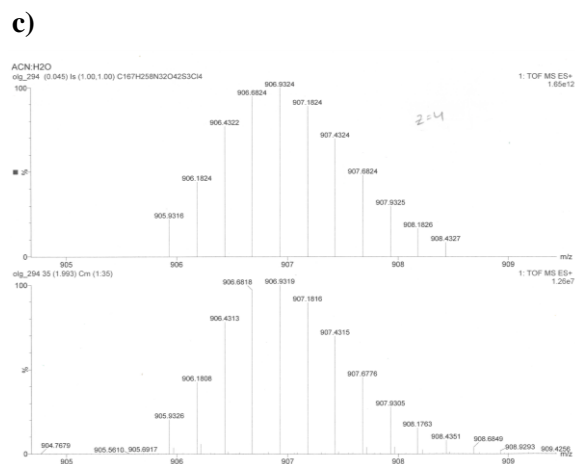

MS spectra for CT-3b. (a) Full spectrum; (b) magnification of the  $[M]^{2+}$  peak range.

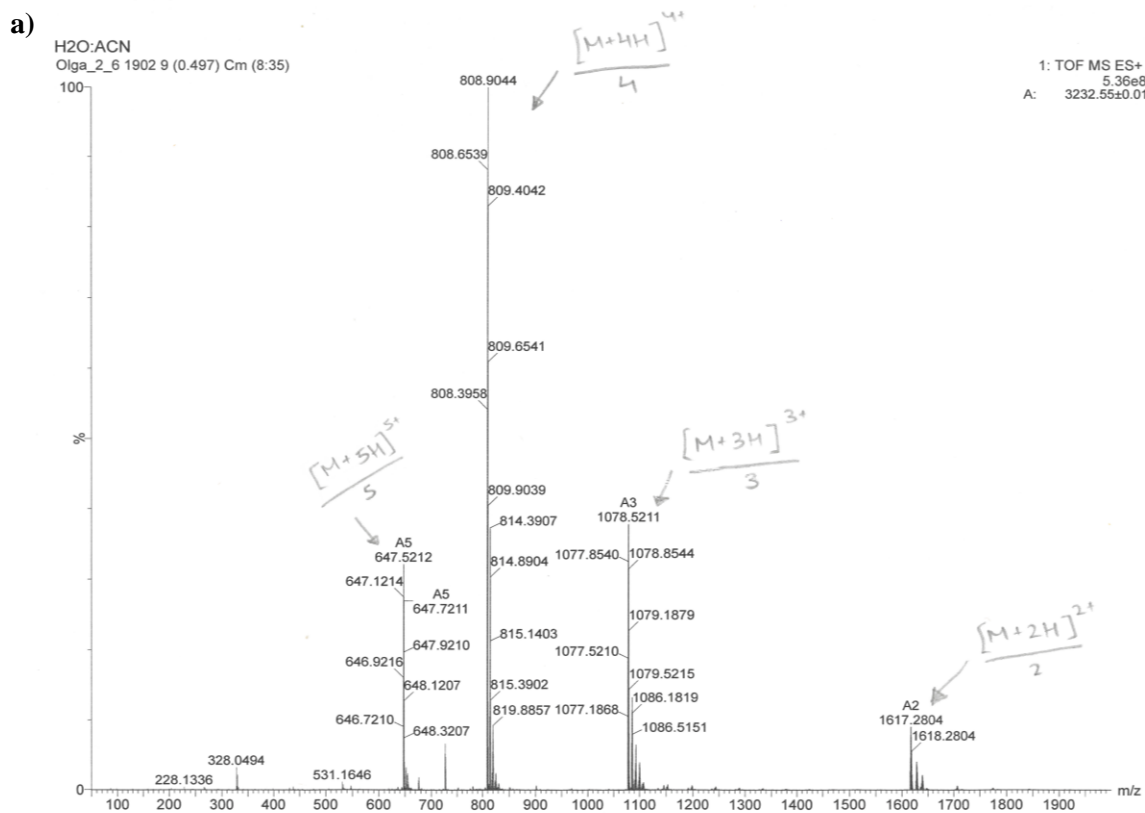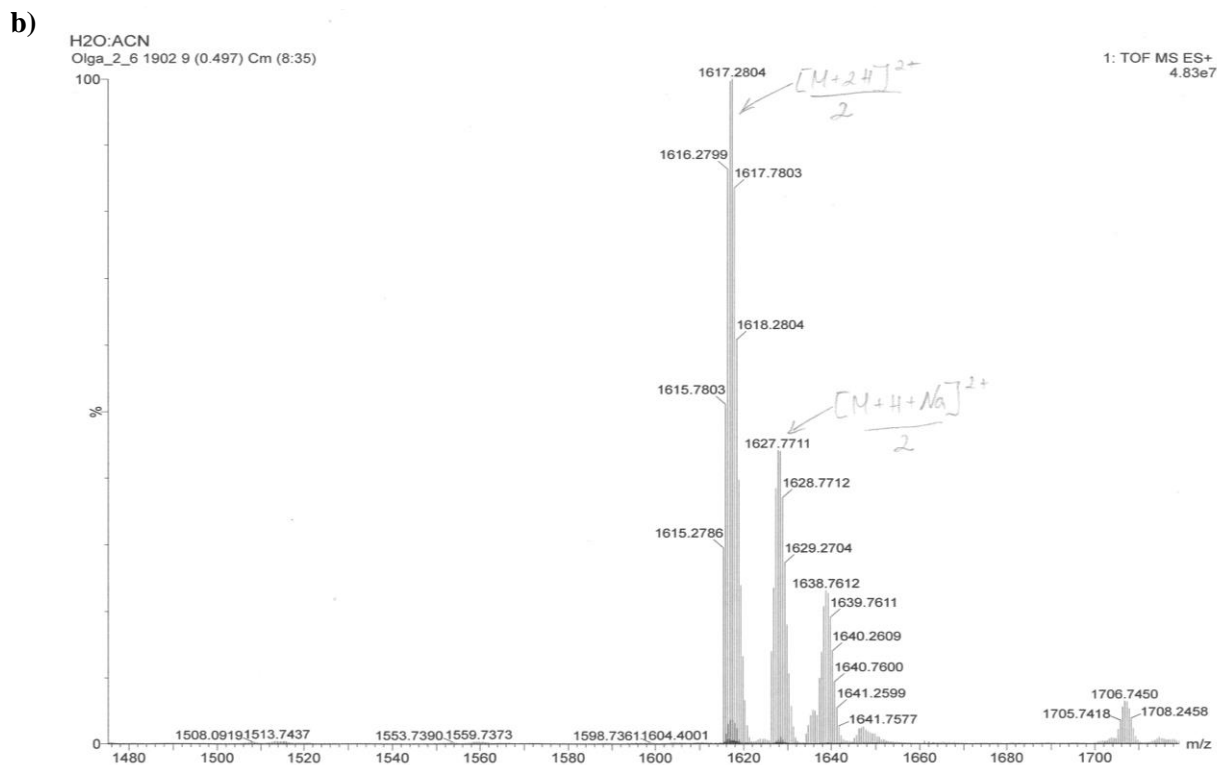

MS spectrum and isotopic patterns for bis-EA-a. (top) Full spectrum; (b) simulated mass (top), and experimental mass distribution (bottom) for  $[M]^{2+}$ , c) simulated mass (top), and experimental mass distribution (bottom) for  $[M]^{3+}$ .

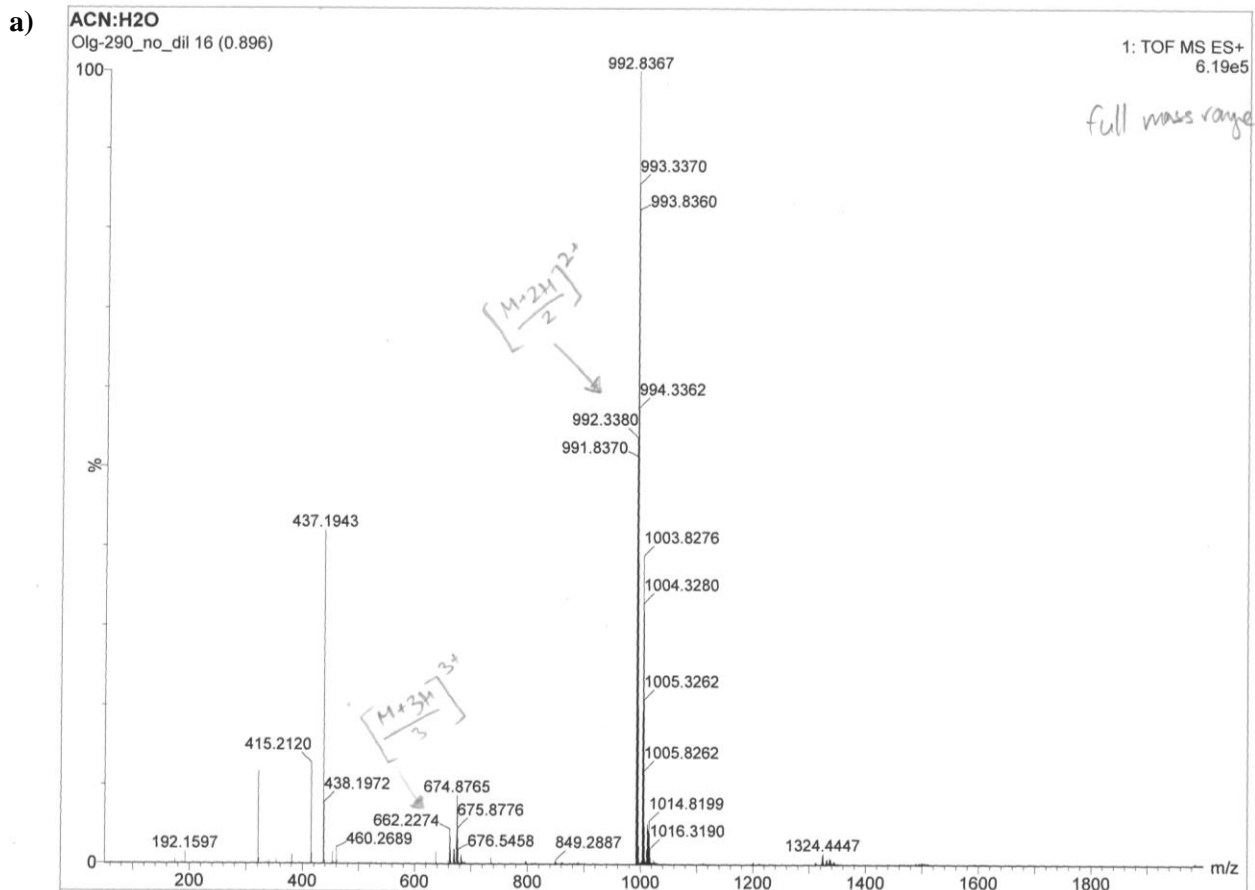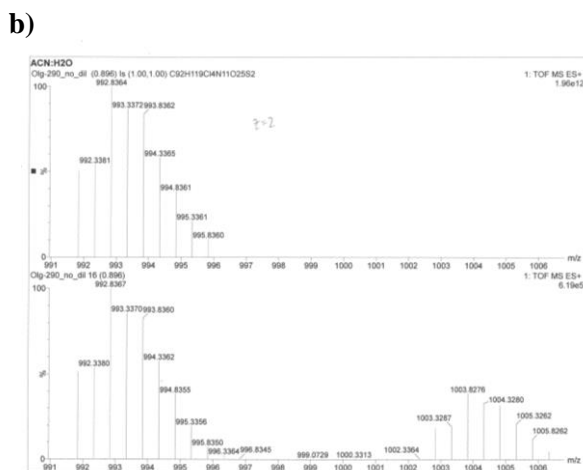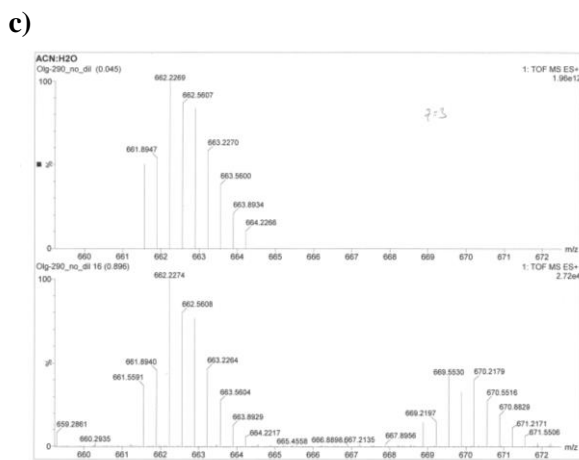

MS spectra for bis-EA-b. (a) Full spectrum; (b) magnification of the [M]<sup>+</sup> peak range.

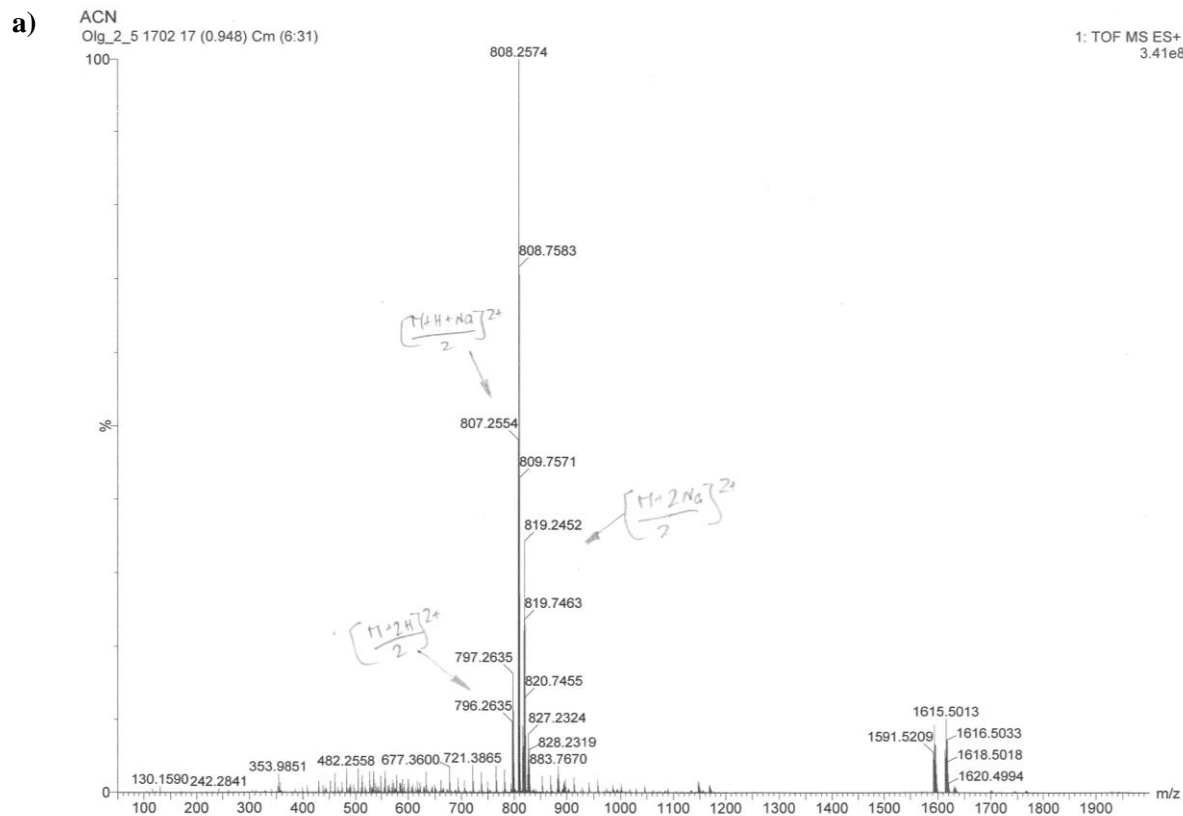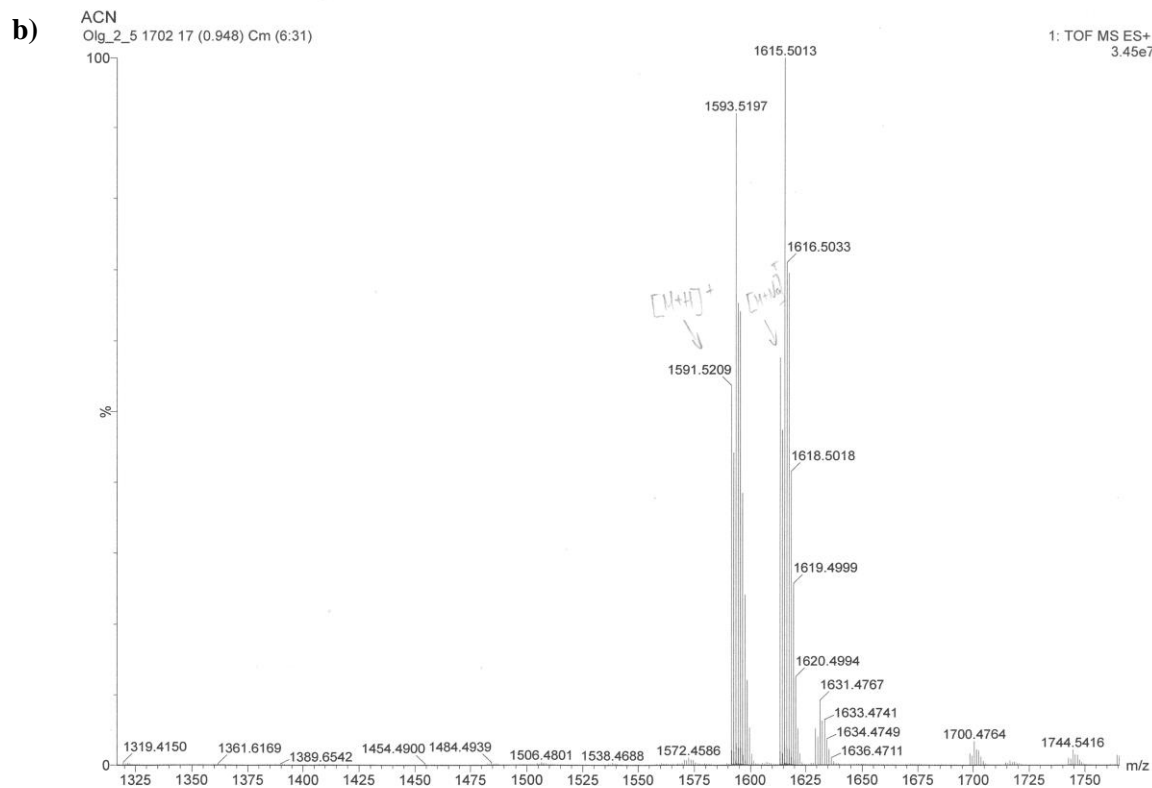

## 11. References

1. Z. Pode, R. Peri-Naor, J. M. Georgeson, T. Ilani, V. Kiss, T. Unger, B. Markus, H. M. Barr, L. Motiei, D. Margulies, *Nat. Nanotechnol.* **2017**, *12*, 1161.
2. W. H. Habig, M. J. Pabst, W. B. Jakoby, *J. Bio. Chem.* **1974**, *249*, 7130.
3. S. S. Mahajan, L. Hou, C. Doneanu, R. Paranjli, D. Maeda, J. Zebala, W. M. Atkins, *J. Am. Chem. Soc.* **2006**, *128*, 8615.
4. R. P. Lyon, J. J. Hill, W. M. Atkins, *Biochemistry* **2003**, *42*, 10418.
5. D. M. Jameson, J. A. Ross, *Chem. Rev.* **2010**, *110*, 2685.
6. G. Mocz, *J. Fluoresc.* **2006**, *16*, 511.
